# Supplementary material for: Estimated Seroprevalence of SARS-CoV-2 Antibodies Among Adults in Orange County, California
Source: bioRxiv or medRxiv preprint supplement (doi:10.1101/2020.10.07.20208660), 2020-10-12

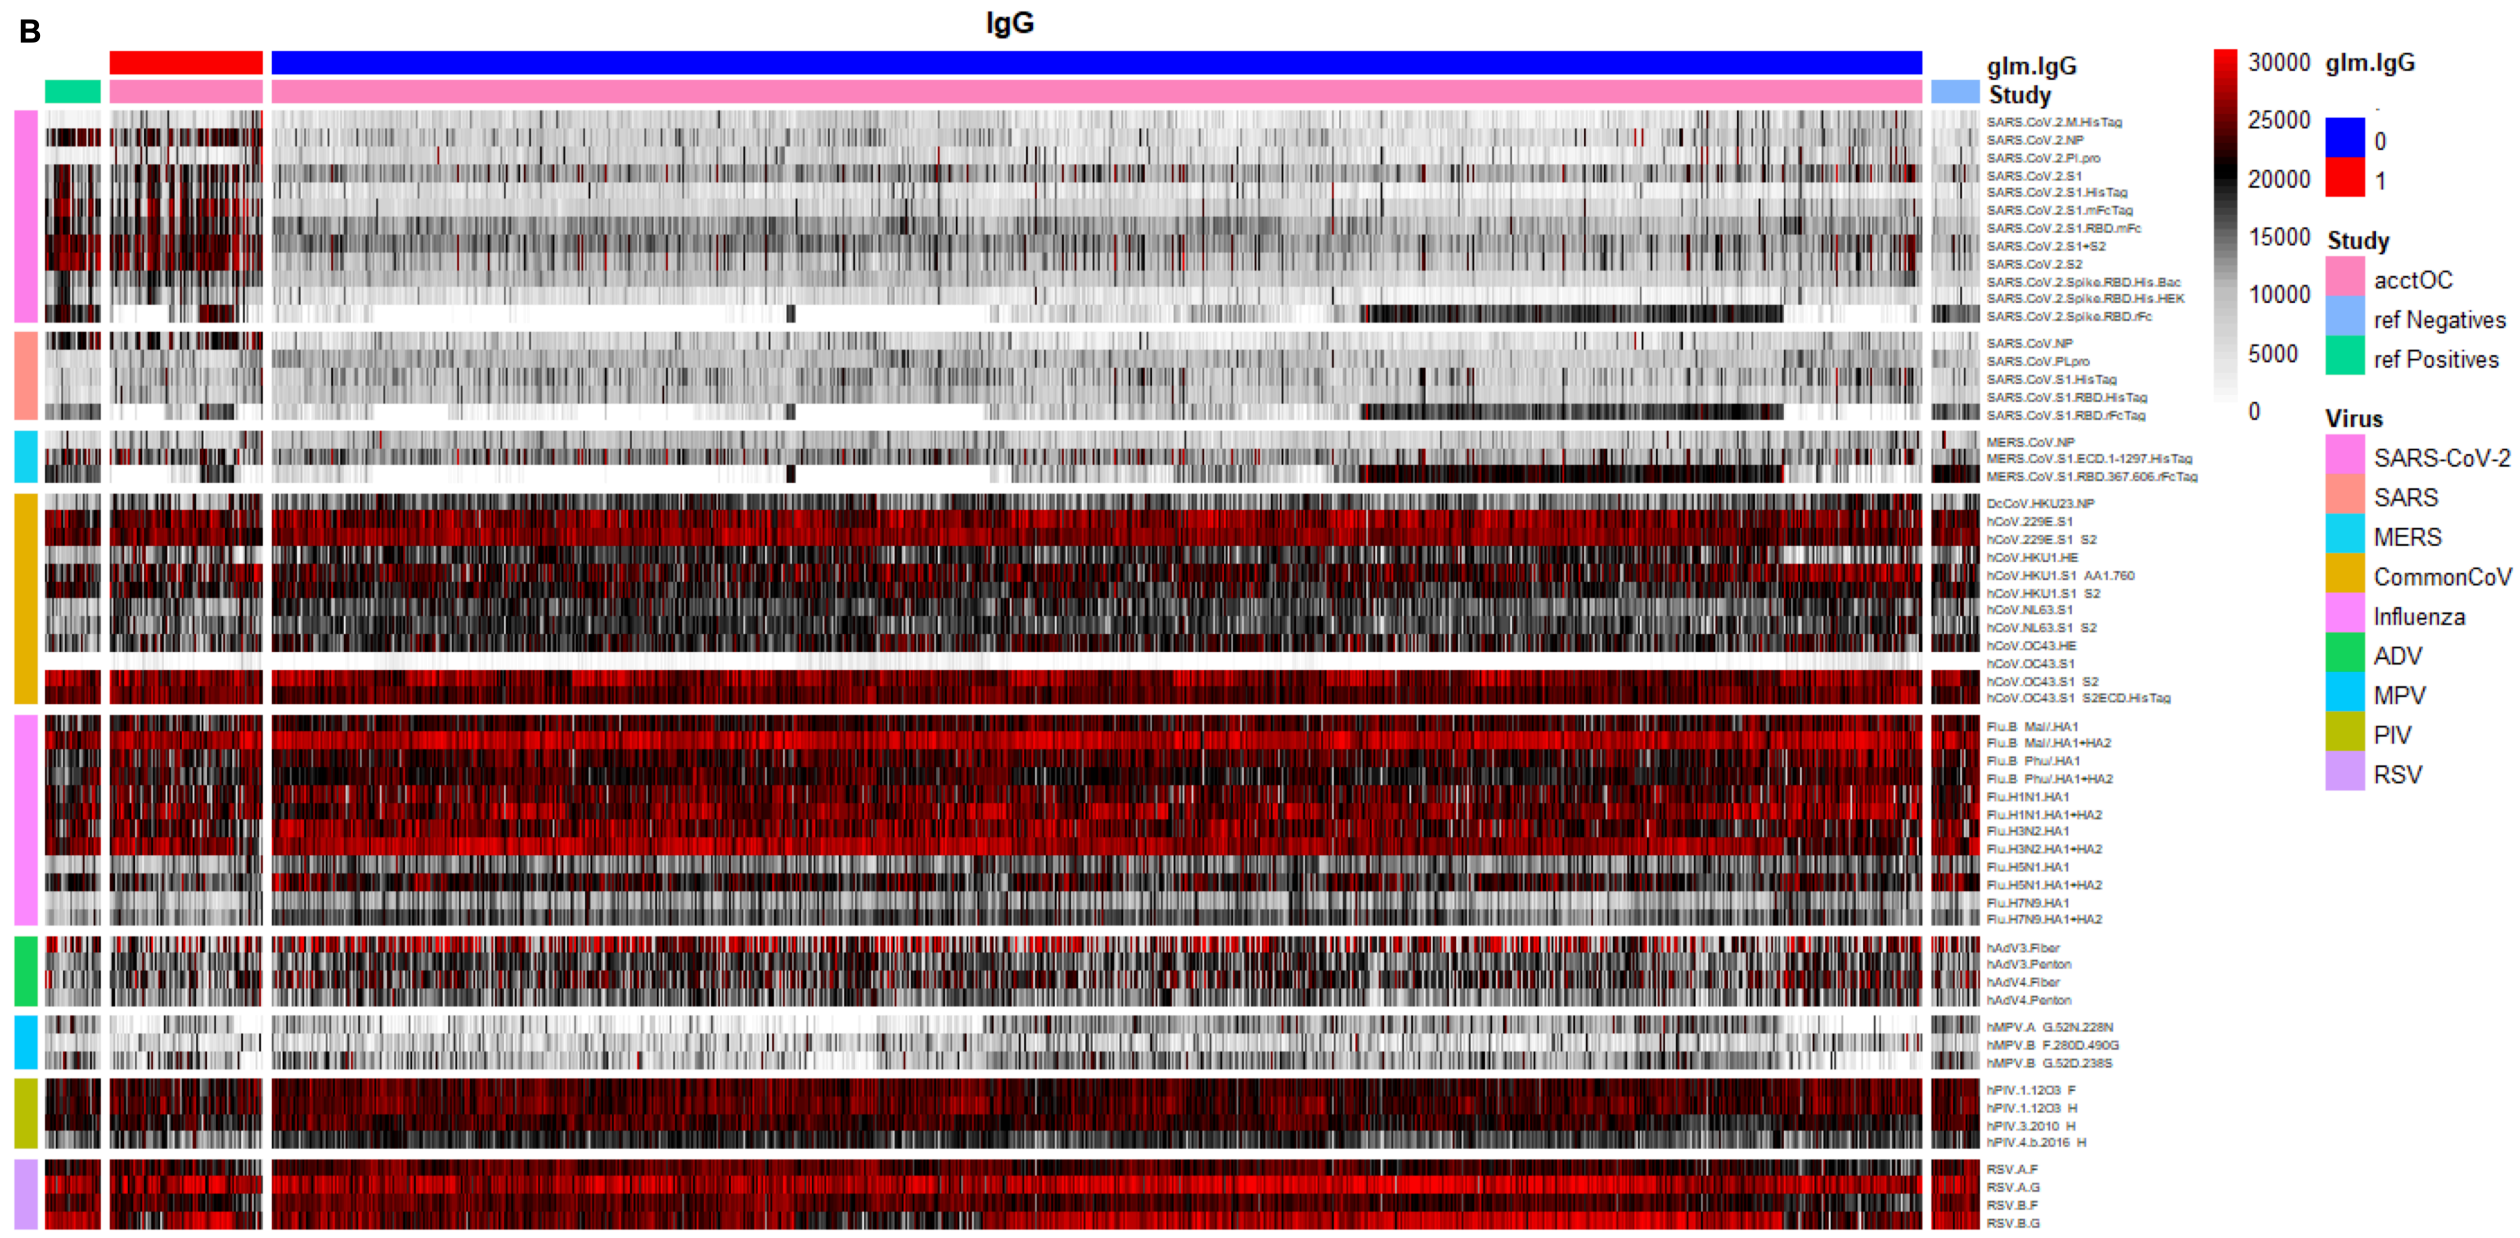

Supplement: Supplementary file [file media-2.pdf]
